# Supplementary material for: Abortive Infection of Snakehead Fish Vesiculovirus in ZF4 Cells Was Associated with the RLRs Pathway Activation by Viral Replicative Intermediates
Source: MDPI journal article supplement (doi:10.3390/ijms16036235), 2015-03-18
Supplement: s1 [file s1]

# Supplementary Information

1 ACAAGACCGAAGCAACACACAGACCTCTCGACAGCATACGTATTGCAGAGATGGAGCTCA  
1 M E L

61 GACTCAGGCCATATCAGGAGGAGGTGGTCCAGGCGGCTTTAAGAGGAGAGAACAGCATCA  
4 R L R P Y Q E E V V Q A A L R G E N S I

121 TCTGGCTGCCACTGGTGGAGGAAAACTCGTGCTGCGGTTTACGTCGCTGAGAAACATC  
24 I W L P T G G G K T R A A V Y V A E K H

181 TAGAGACCAAGGCAATGCCAAAGTGGCAGTCTCGTCAATAAGGTGCACCTGGTAGACC  
44 L E T K A N A K V A V L V N K V H L V D

241 AGCACTATATGAAAGAATTTGGCCATTACCTAAGGCACAAATACAGGATAAAGGCCATCA  
64 Q H Y M K E F G H Y L R H K Y R I K A I

301 GTGGTGACAGCAGTGAGAAAAGACTTTTTGGGCGTCTTGTTAGAGTCTCAGACTTGGTCA  
84 S G D S S E K D F F G R L V R V S D L V

361 TCTGCACGGCTCAGATTCTGAAAAACGCCTTGAACAACATGGATGAGGACAAGCACGTGG  
104 I C T A Q I L E N A L N N M D E D K H V

421 AGATCACTGATTTTACCCTACTGATCATAGATGAATGTCATCACACAAATAAGGAGAGTG  
124 E I T D F T L L I I D E C H H T N K E S

481 TCTATAACAAGATTATGTGGCGTTACGTGGAGAAGAAAGTGAGAAAAGAAGGCAGACTGC  
144 V Y N K I M W R Y V E K K V R K E G R L

541 CTCAGATTTTGGGCTCACAGCATCACCTGGTACAGGAGGAAAACAAGTCATTGGATAAAG  
164 P Q I L G L T A S P G T G G N K S L D K

601 CTGTTGAACACGTCCTGCAGATCTGTGCAATCTGGATTCAAAAATTGTGTCCACCAAGA  
184 A V E H V L Q I C A N L D S K I V S T K

661 ATTACACACCGATGCTGCAGAACTTTGTGCCAAAACCCAAAAAGGAATACGACATTGTGC  
204 N Y T P M L Q N F V P K P K K E Y D I V

721 AAAGAAGAGATAAAGATCCATTTGGTGACCACTTGAAGTCAATGATGTTAATGATTTCATG  
224 E R R D K D P F G D H L K S M M L M I H

781 AGTTTATGCCAGCAACGGTGGGTAGCAGCCTGAGAGAACTAGGCACCCAGGAATATGAGG  
244 E F M P A T V G S S L R E L G T Q E Y E

841 CTGATGTGGTGGAACTGGAGAAAGCAGGTGTAAAAGTAAAGAACAGACTGATCGCTCAGT  
264 A D V V E L E K A G V K V K N R L I A Q

901 GCGCTTTGCATCTACGCAAATACAATGATGCCCTTCTCATTAAATGACACCATTGCGATGG

Figure S1. Cont.

284 C A L H L R K Y N D A L L I N D T I R M

961 TGGATGCGTTCAGAGTGCTGGAAGAGTTTACAATACAAGAAGCAGCAAGTTGCTGGATG  
304 V D A F R V L E E F Y N T R S S K L L D

1021 GAACAGACATCTTTCTACAAGGACTTTTCGATGAGAACAGTCTGGAGTTAAAAATCTGG  
324 G T D I F L Q G L F D E N S L E L K H L

1081 CGTCGGACGCCGATATGAAAACCCCAAAGTCTCAACTGCAGAGCAGATTGCTGGAAG  
344 A S D A R Y E N P K L A Q L Q S R L L E

1141 AGTTCCAAGACACTAATTCTCGTGAATCATCTTCTCAAAGACAGCAGAGGCACGCATT  
364 E F Q D T N S R G I I F S K T R R G T H

1201 GTCTGAATGACTGGGTGAAAACAAACCGTGAGCTGCAGAGGGTCAACATCACTGCTGGCA  
384 C L N D W V K T N R E L Q R V N I T A G

1261 TTCTGACCGGAGCCGGTAATGGCGCTAACAACATGACACAGACTGAACAGAAGAGCGTCA  
404 I L T G A G N G A N N M T Q T E Q K S V

1321 TCAGTCATTTAGGCAAGGATACCTCAACCTCCTCATCTCCACCAGTGTAGCTGAGGAGG  
424 I S H F R Q G Y L N L L I S T S V A E E

1381 GACTGGATATCCTGAATGCAACTTAGTTGTGCGTTACGGGCTGTTGACCAATGAAATCG  
444 G L D I P E C N L V V R Y G L L T N E I

1441 CTCAGCAGCAGGCCAGCGGACGAGCTCGAGCCTCCAACAGTGTCTACTCTGTGGTGGCTG  
464 A Q Q Q A S G R A R A S N S V Y S V V A

1501 ACGTAGGTGGACGGGAAGTGCACAAAGAACTGTCAATGAGTATCTAGAAGATCTCACCG  
484 D V G G R E V R K E L V N E Y L E D L T

1561 CAAGAGCTATTGATGAAGTACAGCGCATGAGTCCTGTGGACTTCAGACACAAGGTGTTTG  
504 A R A I D E V Q R M S P V D F R H K V F

1621 AGCTCCAGAAAACAGCTGTGGTGATTTCGGATGGAGGCTGAACGGAAGAGGGATGCGAAAA  
524 E L Q K T A V V I R M E A E R K R D A K

1681 AGCAGCGCTATAGTCCAGGTCAGGTTTCAGCTTCAGTGCAGAAGCTGCTTCGCTTCCGCTC  
544 K Q R Y S P G Q V Q L Q C R S C F A S V

1741 GCAGCGGAGGAGACATCAGGAAGATCGAGAAGTCCGACCATGTCAACGTTAACTGAGT  
564 C S G G D I R K I E N S H H V N V N T E

1801 TTA AAAATCACTATAAAAGTTGGTGGCCAGGTGAATATGGAGAGGACCTTTGAAGACTGGG  
584 F K N H Y K V G G Q V N M E R T F E D W

Figure S1. Cont.

1861 AGCCTGGACGGATTATCAGCTGCAGACGTTGTGGAGAGGACTGGGGATTTCGAGATTAAT  
604 E P G R I I S C R R C G E D W G F E I K

1921 TCAAGAAAGTGGCAATTCTCCCCTGTCTGAACATAAAGAGCTTCTCCTTTAACACCCTA  
624 F K K V A I L P C L N I K S F S F N T P

1981 AAGAAACAAAGCCTTACAAGAAGTGAAGGATGTTGAGTTTCAGGTGACAGAGTTTGACT  
644 K E T K P Y K K W K D V E F Q V T E F D

2041 TTATTGAGTACATGAGCTGCCGTTCCCTGACCTGGACTTGTCTGACTGATACAGCTCCA  
664 F I E Y M S C R F P D L D L S D \*

2101 TACCACTGATTTAATTGAAATATGAAATAATACATATTCTGATTATGTTAATGCTCCGTC  
2161 TTGGTCTTCATGCATGTGGTGACAGTAGTAGAAGCAGATAGATGGTTTTATTCAAAC  
2221 TAGGGCTGCAATTGATTTAAAAAATTAACCTAAGTAATCACAGTTTTTTGTAATTAATCA  
2281 TAATTAATCATGGAATGCCATGTTATTACAGAAATAGAAACACAGGCATGTAAGTGCCA  
2341 TTTGAATTTCAAATAATCAATGCCAATAACAAACAAAAACATTTCCATGTGGATTCTA  
2401 ATTGGACTACAAAAAATCCAAATACAGGCATTGCAAATATAGAAAAAAAAAAAAAAAA  
2461 AAAAAAAAAAAAAA

**Figure S1.** Nucleotide and deduced amino acid sequences of DrLGP2a from *Danio rerio*. The start codon (ATG) was shown by underline. The termination code (TAG) was marked with an asterisk below. The motif associated with mRNA instability (ATTTA) was in bold underline. Shadow said DEXDc (DEAD/DEAH box helicase domain), double underline said HELICc, the box said RD (regulatory domain).

1 ACAAGACCGAAGCAACACACAGACCTCTCGACAGCATACGTATTGCAGAGATGGAGCTCA  
1 M E L

61 GACTCAGGCCATATCAGGAGGAGGTGGTCCAGGCGGCTTTAAGAGGAGAGAACAGCATCA  
4 R L R P Y Q E E V V Q A A L R G E N S I

121 TCTGGCTGCCACTGGTGGAGGAAAACTCGTGCTGCGGTTTACGTCGCTGAGAAACATC  
24 I W L P T G G G K T R A A V Y V A E K H

181 TAGAGACCAAGGCCAATGCCAAAGTGGCAGTGCTCGTCAATAAGGTGCACCTGGTAGACC  
44 L E T K A N A K V A V L V N K V H L V D

241 AGCACTATATGAAAGAATTTGGCCATTACCTAAGGCACAAATACAGGATAAAGGCCATCA  
64 Q H Y M K E F G H Y L R H K Y R I K A I

301 GTGGTGACAGCAGTGAGAAAGACTTTTTGGGCGTCTTGTTAGAGTCTCAGACTTGGTCA  
84 S G D S S E K D F F G R L V R V S D L V

361 TCTGCACGGCTCAGATTCTGAAAAACGCCTTGAACAACATGGATGAGGACAAGCACGTGG  
104 I C T A Q I L E N A L N N M D E D K H V

**Figure S2. Cont.**

421 AGATCACTGATTTTACCCTACTGATCATAGATGAATGTCATCACACAAATAAGGAGAGTG  
 124 E I T D F T L L I I D E C H H T N K E S

481 TCTATAACAAGATTATGTGGCGTTACGTGGAGAAGAAAGTGAGAAAAGAAGGCAGACTGC  
 144 V Y N K I M W R Y V E K K V R K E G R L

541 CTCAGATTTTGGGCCTCACAGCATCACCTGGTACAGGAGGAAACAAGTCATTGGATAAAG  
 164 P Q I L G L T A S P G T G G N K S L D K

601 CTGTTGAACACGTCCTCGCAGATCTGTGCCAATCTGGATTCAAAAATTGTGTCCACCAAGA  
 184 A V E H V L Q I C A N L D S K I V S T K

661 ATTACACACCGATGCTGCAGAACTTTGTGCCAAAACCCAAAAAGGAATACGACATTGTCTG  
 204 N Y T P M L Q N F V P K P K K E Y D I V

721 AAAGAAGAGATAAAGATCCATTTGGTGACCACTGAAGTCAATGATGTTAATGATTTCATG  
 224 E R R D K D P F G D H L K S M M L M I H

781 AGTTTATGCCAGCAACGGTGGGTAGCAGCCTGAGAGAAGTACAGGACCCAGGAATATGAGG  
 244 E F M P A T V G S S L R E L G T Q E Y E

841 CTGATGTGGTGGAACTGGAGAAAGCAGGTGTAAGTAAAGAACAGACTGATCGCTCAGT  
 264 A D V V E L E K A G V K V K N R L I A Q

901 GCGCTTTCATCTACGCAAATACAATGATGCCCTTCTCATTAAATGACACCATTGCGATGG  
 284 C A L H L R K Y N D A L L I N D T I R M

961 TGGATGCGTTCAGAGTGCTGGAAGAGTTTTACAATAACAAGAAGCAGCAAGTTGCTGGATG  
 304 V D A F R V L E E F Y N T R S S K L L D

1021 GAACAGACATCTTTCTACAAGGACTTTTCGATGAGAACAGTCTGGAGTTAAAACATCTGG  
 324 G T D I F L Q G L F D E N S L E L K H L

1081 CGTCGGACGCCGATATGAAAACCCAAACTAGCTCAACTGCAGAGCAGATTGCTGGAAG  
 344 A S D A R Y E N P K L A Q L Q S R L L E

1141 AGTTCCAAGACACTAATTCTCGTGAATCATCTTCTCAAAGACACGCAGAGGCACGCATT  
 364 E F Q D T N S R G I I F S K T R R G T H

1201 GTCTGAATGACTGGGTGAAAACAAACCGTGAGCTGCAGAGGGTCAACATCACTGCTGGCA  
 384 C L N D W V K T N R E L Q R V N I T A G

1261 TTCTGACCGAGCCGTAATGGCGCTAACCAACATGACACAGACTGAACAGAAGAGCGTCA  
 404 I L T G A G N G A N N M T Q T E Q K S V

1321 TCAGTCATTTTAGGAAGGATACCTCAACCTCCTCATCTCCACCAGTGTAGCTGAGGAGG

**Figure S2. Cont.**

424 I S H F R Q G Y L N L L I S T S V A E E

1381 GACTGGATATTCCTGAATGCAACTTAGTTGTGCGTTACGGGCTGTTGACCAATGAAATCG  
444 G L D I P E C N L V V R Y G L L T N E I

1441 CTCAGCAGCAGGCCAGCGGACGAGCTCGAGCCTCCAACAGTGTCTACTCTGTGGTGGCTG  
464 A Q Q Q A S G R A R A S N S V Y S V V A

1501 ACGTAGGTGGACGGGAAGTGCACAAAGAACTTGTCAATGAGTATCTAGAAGATCTACCCG  
484 D V G G R E V R K E L V N E Y L E D L T

1561 CAAGAGCTATTGATGAAGTACAGCGCATGAGTCCTGTGGACTTCAGACACGAGGTTTGTG  
504 A R A I D E V Q R M S P V D F R H E V C

1621 TTTGACTTTTTACTATTAAATCTGACTGTGTTTGAATAGAATAGAAAACTTAAAAGGA  
524 V \*

1681 CAATTCACCTAGACTTCACAATTCTGTCATCATTTACCCAAACATGAGTTTCTTTCTTCT  
1741 GTTGAACACAAAAAGAAGTTACTTTTTGAATAGTGTGGAAGCCTGTAACCATTGACTTCC  
1801 ATAGTATTGTTTTTCTACCATTTAAGTCGGTGGTTACCGGTTTCTAACATACTTCAGA  
1861 ATATCCATTTTGTGTTTAAACAGAAAAGAGAACTTCTTAAGGTTTGAATCACGTGAGTA  
1921 AACAGTGAGTACATTTTCATTTTGTAGTAACTATATTTTTAAAGGTGTTTCACATACGA  
1981 AATCTACTGTAAGTCTGTTGACAGATTAGAGTTCTTTGTTAGTATTGCTCCCAAGTCTA  
2041 GCGGAAAACAACATGGGCATA**AATAAA**CAAAGAAAACAAATGTGTTAGGGTGGTGGATTC  
2101 CCAAACAAAACAAAACCTTAATGCAAAAAGATCCCTTTCGGTCGACAACCAAACTCGGACA  
2161 CTCAGTTGAGAGTATTTAAATAGATTTATTATAGGAAAAAGTAGTAAATATAAATGAGCA  
2221 TCCCTTCAGGATCTCCACAGGCCAAAAAAAAAAAAAAAAAAAAAAAAA

**Figure S2.** Nucleotide and deduced amino acid sequences of DrLGP2b from *Danio rerio*. The start codon (ATG) was shown by underline. The termination code (TAG) was marked with an asterisk. The typical polyadenylation signal AATAAA was bolded. The motif associated with mRNA instability (ATTTA) was in bold underline. Shadow said DEXDc (DEAD/DEAH box helicase domain), double underline said HELICc domain structure.

|         |                                                                  |
|---------|------------------------------------------------------------------|
| DrLGP2a | —MELRLRPYQEEVVQAALRGENSI IWLPTGGGKTRAAVYVAEKHLETKANAKVAVLVNKV    |
| DrLGP2a | —MELRLRPYQEEVVQAALRGENSI IWLPTGGGKTRAAVYVAEKHLETKANAKVAVLVNKV    |
| CiLGP2  | —MEITLRSYQEEVVQAALRGENSI IWLPTGGGKTRAAVYVAKKHLETTTRNAKAVAVLVNKV  |
| IpLGP2  | —MEISLRPYQEEVVQVALRGENSI IWLPTGGGKTRAAVYVAKRHLETHPNGKVAVLVNKV    |
| PoLGP2  | MAELGLYSYQEEVVERAIKGENVI IWLPTGGGKTRAAVYVAKRHLETTQHAKVVVLVNVK    |
| XlLGP2  | ---MELHDYQWEVIGPALEGKNI I IWLPTGAGKTRAAVYVAMRHLEMKRNAKVMVNVK     |
| GaLGP2  | ---MELHGYQLEAVAPALRGRNSIVWLP TGAGKTRAAVHVCRRHLEGRRRGRVAVLVNVK    |
| MmLGP2  | ---MELRPYQWEVILPALEGKNI I IWLPTGAGKTRAAAFVAKRHLETTVDGRKVVVLVNRV  |
| HsLGP2  | ---MELRSYQWEVIMPALLEGKNI I IWLPTGAGKTRAAAVYAKRHLETTVDGAKVVVLVNRV |
|         | : * ** * . : * : . * * * :*****.***** . * . :*** . : * : : * : * |

**Figure S3.** Cont.

|         |                                                                    |
|---------|--------------------------------------------------------------------|
| DrLGP2a | HLVDQHYMKEFGHYLRHKYRIKAISGDSSEKDFFGRLVRVSDLVICTAQILENALNMDE        |
| DrLGP2b | HLVDQHYMKEFGHYLRHKYRIKAISGDSSEKDFFGRLVRVSDLVICTAQILENALNMDE        |
| CiLGP2  | HLVDQHFNFNFPYLGKAYRVKAISGDSSEKDFFGRLVKDSLIICTAQILENALNSSEE         |
| IpLGP2  | HLVDQHFQKEFRPHLGSVVMVPIISGDSNEKDFFGCVVRDSSLVICTAQILENALINTEE       |
| PoLGP2  | HLVDQHYTEKFKPHLGSNYTLVPVSGESELKDLFGKVVQSDVVICTAQILYNALTNSEE        |
| XiLGP2  | HLVDQHFSNEFHPLKDKYKVAISGDTEHKCFEALVQNNVICTAQILQNALSSSSE            |
| GaLGP2  | HLVQQHLEKEFH-VLRDAFKVTAVSGDSSHCKFFGQLAKGSDVVICTAQILQNALSGEE        |
| MmLGP2  | HLVSQHAE-EFRRLDKHWTVTLSGDMGSRAGFGLMARSHDLLICTAELLQALNSSEE          |
| HsLGP2  | HLVTQHGE-EFRRLDGRWVTVTLSGDMGPRAGFGLARCHDLLICTAELLQMALTSPEE         |
|         | *** ** * * : . : ** : * . : . : . : ** : ** . . *                  |
|         |                                                                    |
| DrLGP2a | DKHVEITDFLLIIDECHHTNKESVYNKIMWRYVEKKVRKEGRLPQILGLTASPGTGGNK        |
| DrLGP2b | DKHVEITDFLLIIDECHHTNKESVYNKIMWRYVEKKVRKEGRLPQILGLTASPGTGGNK        |
| CiLGP2  | EKHVELTDFSLIIDECHHTKQESVYNKIMGRYVEKKVRKERKLPQVLGLTASPGTGGNK        |
| IpLGP2  | SKHVELTDFLLIIDECHHTKEGVYNKIMARYVRKKIERVKGLPQILGLTASPGTGGAK         |
| PoLGP2  | TKHVELSDITLLIFDECHHTKGGVYNQIMKCYVEKKLGERRLPQILGLTASPGTGGAR         |
| XiLGP2  | EIHVELTDFLLIIDECHHTKDGVYNKLMGYLERKITQKGLPQILGLTASPGTGRAT           |
| GaLGP2  | EARVELTDFSLVIDECHHTQEAVERNKIMLSYLQKQLSGQRDLPQILGLTASPGTGGET        |
| MmLGP2  | DEHVELREFSLIVVDECHHTKDTVYNTILSRYLEQKLKAEPLPQVLGLTASPGTGGAT         |
| HsLGP2  | EEHVELTVFSLIVVDECHHTKDTVYNVIMSQYLELKLQRAQPLPQVLGLTASPGTGGAS        |
|         | : ** : : : . : . : ** : ** : * . : * : ** : ** : ** : ** : ** : ** |
|         |                                                                    |
| DrLGP2a | SLDKAVEHVLQICANLDS-KIVSTKNYTPMLQNFVPKPKKEYDIVERRRDKPFGDHLKSM       |
| DrLGP2b | SLDKAVEHVLQICANLDS-KIVSTKNYTPMLQNFVPKPKKEYDIVERRRDKPFGDHLKSM       |
| CiLGP2  | TLAKAVEHVLQICANLDS-VIVSTKNYASKLKEVPRPRKQYDIVEKRALDPFGDHLKLM        |
| IpLGP2  | SLDGAITHVLEICANLDS-VIVSTKNYAEELKEAVPRPMKNYDIVDERYWDPFGDHLKMM       |
| PoLGP2  | ILEKAVEHVLQICANLDS-SIVSTRLYAPELKKKVPRIKTFDIVENRPDPFGNHLKRM         |
| XiLGP2  | SFEKAEHILQICANLDTWRIMSAEVHREDLEAKAKQPNKQYDLVTERPRDPFGDKLKL         |
| GaLGP2  | SFEGAVEHILQICANLDEVIASAQEAHLQSHVPQPTKQYDLCQEREQDPFGQLKKI           |
| MmLGP2  | KLQGAIDHILQLCANLDTCHIMSPKNCYSQLMHNPKPKQYDLCQRRADPFGDLIKKL          |
| HsLGP2  | KLDGAINHVLQLCANLDTWCIMSPQNCCPQLQEHSPCKQYNLCHRRSQDPFGDLKKL          |
|         | : * * : : ** : ** : * . : * : * * : : . * ** : ** :                |
|         |                                                                    |
| DrLGP2a | MLMIHEFMPATVG-SSLRELGTQEYEAADVVELEKAGVKVNRLIAQCALHLRKYNDALLI       |
| DrLGP2b | MLMIHEFMPATVG-SSLRELGTQEYEAADVVELEKAGVKVNRLIAQCALHLRKYNDALLI       |
| CiLGP2  | MSLIHEFMPSTVS-RSLREVGTDQEYEAADVVELEKGTGVEENRLITQCALHLRKYNDALLI     |
| IpLGP2  | MKLIHEFMMLDRK-FTLREMGTDQEYEAADVVELEKKGVEQNRLLARCALHLRKFNDALLI      |
| PoLGP2  | MQMIQDYMNLPSTDFRLRECGTQEYEAADVILEQRGIRENRRLAQCALHLRKYNDALLI        |
| XiLGP2  | MKTIHEYLRTTDF--CESDFGTQLYEQKVVVELEKEGAVEANRMKRTCALHLRKYNDALLI      |
| GaLGP2  | MAQIQEHMEMPEL--PQN-FGTQVYEQRIVELENRAAERFCRKRVCALHLRKYNDALLI        |
| MmLGP2  | MNQIHQQLEMPDL--KQQ-FGTQMYEQVVLCKDAEAGLQEQRVYALHLRKYNDALLI          |
| HsLGP2  | MDQIHDHLEMPDL--SRK-FGTQMYEQVVKLSEAAALAGLQEQRVYALHLRKYNDALLI        |
|         | * * : : ** * * : * * : . : ** : ** : ** : ** :                     |
|         |                                                                    |
| DrLGP2a | NDTIRMVDAFRVLEEFYNTR--SSKLLDGTDFLQGLFDENSLELKHLSADARYENPKLA        |
| DrLGP2b | NDTIRMVDAFRVLEEFYNTR--SSKLLDGTDFLQGLFDENSLELKHLSADARYENPKLA        |

Figure S3. Cont.

CiLGP2 HDTVRMVDAFNVLDEFYNSR—SNKLLDGTDFFLQGLFDENRVELKQLALDARYENPKLA  
 IpLGP2 NDTVRMVDALRLLEEFYTTE—TRNVLDITDEFLTGLFNENKVELLQLASEASNENPKLE  
 PoLGP2 NDTLLMMDAYRNLEEFYISK—STRAIDKTDFFLVGIFQDNQADLMKVARDSRYENPKMA  
 XlLGP2 HDTVRMMDAYELLDDYYQQEKVIRKQNDPTDAFLIQLFDGNRARLLELAQDVRFENPKLR  
 Gallus NDTVRMMDAFQCLQQFYADK—RDTKDPTERFLATTFEENRATLQALAGDQRYENPRLS  
 MmLGP2 HDTVRARDALDMLQDFYDRERTTKTQMVRAESWLLKLFDDHKNVLGQLAAR—GPENPKLE  
 HsLGP2 HDTVRAVDALAALQDFYHREHVTKTQILCAERRLLALFDDRKNELAHLATH—GPENPKLE  
 :\*: \*\* \*::\* . :: \* \*: . \* :\* \*\*::

DrLGP2a QLQSRLLEEFQDT—NSRGIIFSKTRRGTHCLNDWVKTNRELQRVNITAGILTGAG—NGA  
 DrLGP2b QLQSRLLEEFQDT—NSRGIIFSKTRRGTHCLNDWVKTNRELQRVNITAGILTGAG—NGA  
 CiLGP2 QLQRTLLKEFKENKMSRGIIFSKTRRGTHCLYDWNANHELQKVKISAGILTGTG—TGV  
 IpLGP2 RLQRTLVDQFKDE—NSRGIIFAKTREITRCLYDWVRTNPELRRANIRAANLVGAG—TGA  
 PoLGP2 KLESVLLKQFSSGLQSKGIFSKTRKSIHCLNEWVLNNRLQEAGVKSAILTGAG—NGI  
 XlLGP2 KLEEILRDQFFSSGSRGIIFTRTRQSTHSLHNISSKHSFQIMGVKTAPLTGAGYSNQS  
 GaLGP2 KLEEILQEHFQPPGSSRGIVFTKRQSAHSLLSWLQDTAGLCGHIRAAVLTGSGHSNQA  
 MmLGP2 MLERILLKQFGSPGHTRGIIFTRTRQTASSLLWLRQPCLQTVGIKPQMLIGANTSQS  
 HsLGP2 MLEKILQRQFSSSNSPRGIIFTRTRQSAHSLLWLQQQLQTVDIRAQLLIGANSSQS  
 \*: \* .\* .:\*\*\*:\*\*\*. .\* \*: : :. \*\*:\* .

DrLGP2a NNMTQTEQKSVISHFRQGYLNLLISTSVAEEGLDIPECNLVVRYGLLTNEIAQQASGRA  
 DrLGP2b NNMTQTEQKSVISHFRQGYLNLLISTSVAEEGLDIPECNLVVRYGLLTNEIAQQASGRA  
 CiLGP2 NHMNQNKQKNTIKDFRLGHLNLLISTSVAEEGLDIAECNLVVRYGLLTNEIAQQASGRA  
 IpLGP2 THMTQREQRDTIKTFREGELNLLISTSVAEEGLDIPECNVVIRYGLLTNEIAQQASGRA  
 PoLGP2 TYMTQHEQADTICRFRQTLNLLISTSVAEEGLDIPECNLVVRYGLLTNEIAQQASGRA  
 XlLGP2 KHMTQNEQRETIEMFRKGQLNLLISTSVAEEGLDIPQCNIVVRYGLMTNEISMVQARGRA  
 GaLGP2 KGMTQNEQDVITLFRYGELNLLFSTSVAEEGLDIPECNIVVRYGLMTNEIAMVQAQGRA  
 MmLGP2 THMTQKDQQEVIQEFRDGILSLLVATSVAEEGLDIAQCNVVRYGLLTNEISMVQARGRA  
 HsLGP2 THMTQRDQQEVIQKFQDGTLNLLVATSVAEEGLDIPHCNVVRYGLLTNEISMVQARGRA  
 . \* . \* . . \* \*: \* \*. \*\* :\*\*\*\*\*. \*\*:\*:\*\*\*:\*\*\*: \*\* \*\*

DrLGP2a RASNSVYSVVADVGGREVRKELVNEYLEDLTARAIDEVQRMSPVDFRHKVFELQTAVVI  
 DrLGP2b RASNSVYSVVADVGGREVRKELVNEYLEDLTARAIDEVQRMSPVDFRHEVCV-----  
 CiLGP2 RALNSVYSVVAEKGGRELRREFTNEYLESLTSNAIDQVQSMSPREFRIKITELQMAVLI  
 IpLGP2 RAKNSVYSVVAKAGGREMRKEKTNEYLEELTSKAIAHVQSMEPGRFRQIFELQHEAVTA  
 PoLGP2 RAQDSQYSVVAKGGRERREITNEYLEELTAKAIAQVQDMSIREFQRKITELQTQAVIK  
 XlLGP2 RHEDSCYSFLAKIGGKEIRRETNETLEGLMKRAIEAVQRMPEQEYQKIKELQESVIA  
 GaLGP2 RAQNSMYSVLAKANSREVYREQLNESLVLMERAIRAVQAMPERKYRLKIVELQRNAVLS  
 MmLGP2 RAGQSVYSFLATEGSREMKRELTNEALEVLMEKAVAVQKMDPDEFKAKIRDLQASLVK  
 HsLGP2 RADQSVYAFVATEGSRELKRELINEALETLMEQAVAVQKMDQAEYQAKIRDLQAALTK  
 \* :\* \*::\* ..:\* :\* \*\* \* \* .\*: \*\* \* ::::

DrLGP2a RMEAERKRDAKKRYSPGVQLQRCRSCFASVCSGGDIRKIENSHHVNTEFKNHYKVG—  
 DrLGP2b -----  
 CiLGP2 RIEAERKKDARKRYSPDQVHLQCRGCFVFVGLGEDIRKIENSHHVNINPEFQRHYRTG—  
 IpLGP2 RILMANQRERRRLRYDAEVEFDCRGCFTAVARGDDMRLVNDTQHININPDFERFYKVG—  
 PoLGP2 SRIEESCKMQKRSRYTASSIQLLCRNCFKSVASGSDIKLIDNVHHVNPAFEKHYKVG—

Figure S3. Cont.

|         |                                                                      |
|---------|----------------------------------------------------------------------|
| XiLGP2  | <u>RKVKQAKRDQKRNTFYPEQVRFYCRCCSQAVAHGDDFRTIEGTHYVNINSDFRITYYEVCS</u> |
| GaLGP2  | <u>WQVKEARSSERRQLHDPDDVYFHCVNCNVAVCRGSDIRTVEAMHHVNINPNFRFYTVSS</u>   |
| MmLGP2  | <u>RAARAAHREIQGGFLPEHVQLLCINCMVAVGYGSDLRKVEGTHHVNVNPNFSVYTTTSQ</u>   |
| HsLGP2  | <u>RAAQAAQRENQRQFPVEHVQLLCINCMVAVGHGSDLRKVEGTHHVNVNPNFSNYYNVSR</u>   |
| DrLGP2a | <u>GQVNMERTFEDWEPGRIISCR--RCGEDWGFEEKFKKVAAILPCLNIKSFSENTPKETKPY</u> |
| DrLGP2b | -----                                                                |
| CiLGP2  | <u>KQVFLEKTFEDWEPGQVINCR--KCGKDWGMEIKFKKVAAILPCLNIKSFSLDTPGGKFTH</u> |
| IpLGP2  | <u>GQVYLERTFEDWEPGRTISCV--ACGQNWGMEVKLKN-LVLPCLNIKGFMSMKTRQSSRTA</u> |
| PoLGP2  | <u>GQVILPKMFDDWEPGRIISCNNGNCNKEWGFEMKYKEIALLPNLAIKHLFLQTPDGRMTV</u>  |
| XiLGP2  | <u>PPLDFGKKMVDWTPGGKIRC---LCGQDWGFEMIKH-VNFPAISVKNFVETPEIKRPY</u>    |
| GaLGP2  | <u>GKIHFERFRDWEPCRIVCS--ECRQEWGMEMIYRN-VTLPILSIKNFVVVTPDEKKKY</u>    |
| MmLGP2  | <u>NPVVINKVFKDWRPGGTIRCS--NCGEVWGFQMIYKS-VTLPVLKIGSMLETPRGKIQA</u>   |
| HsLGP2  | <u>DPVVINKVFKDWKPGGVISCR--NCGEVWGLQMIYKS-VKLPVLKVRSMLETPQGRIQA</u>   |
| DrLGP2a | <u>KKWKDVEFQVTEFDIEYMSCRFPDLDSL-</u>                                 |
| DrLGP2b | -----                                                                |
| CiLGP2  | <u>KKWKDVEFQVTEFDIDYMSSRFPDLDDL-</u>                                 |
| IpLGP2  | <u>KKWKDIEFLVEEFDVYVKNRYPDLEQD--</u>                                 |
| PoLGP2  | <u>KKWKDVPFTVDNFSFEEYQDNFPDLLD---</u>                                |
| XiLGP2  | <u>ARWKDVFPVDELNYVQHVRTHPELLVHFED</u>                                |
| GaLGP2  | <u>KKWSTVTFPIEEFSYLEYCSSTQDESL----</u>                               |
| MmLGP2  | <u>KKWSRVPFSPVFDILQDCTQSLSESLD--</u>                                 |
| HsLGP2  | <u>KKWSRVPFSPVDFDLQHCAENLSDSLD--</u>                                 |

**Figure S3.** Multiple alignment of LGP2 using the Clustal X2 program. LGP2 are conserved in vertebrates. Identical amino acids among all sequences are indicated by asterisks whereas those with high or low similarity are indicated by “:” and “.” respectively. Marked conserved domains include the DEXDc (DEAD/DEAH box helicase domain) (Shaded), the HELICc (bold underlined) and the RD (regulatory domain) (double underlined). CiLGP2 (*Ctenopharyngodon idella*, AFQ93565.1), Gg (*Gallus gallus*, AEK21509.1), HsLGP2 (*Homo sapiens*, NM\_024119.2), IpLGP2 (*Ictalurus punctatus*, AFS34610.1), MmLGP2 (*Mus musculus*, NM\_030150.2), PoLGP2 (*Paralichthys olivaceus*, ADM18136.1), XiLGP2 (*Xenopus laevis*, NP\_001085915.1).
